# EGFR Gene Copy Number as a Prognostic Marker in Colorectal Cancer Patients Treated with Cetuximab or Panitumumab: A Systematic Review and Meta Analysis

Zheng Jiang<sup>1,2,3</sup>, Chunxiang Li<sup>3</sup>, Fuyuan Li<sup>4</sup>, Xishan Wang<sup>1,2\*</sup>

**1** Department of Colorectal Cancer Surgery, The 2nd Affiliated Hospital, Harbin Medical University, Harbin, Heilongjiang, China, **2** Colorectal Cancer Institute of the Heilongjiang Academy of Medical Sciences, Harbin, Heilongjiang, China, **3** Laboratory of Medical Genetics, Harbin Medical University, Harbin, Heilongjiang, China, **4** Department of Biochemistry and Molecular Biology, Harbin Medical University, Harbin, Heilongjiang, China

## Abstract

**Background:** The epidermal growth factor receptor (EGFR) gene copy number (GCN) has been previously demonstrated to correlate with the clinical outcome of colorectal cancer (CRC) treated with anti-EGFR monoclonal antibodies (mAbs), although it remains controversial. We conducted a systematic review and meta-analysis to assess EGFR GCN as a potential biomarker of survival for patients with advanced CRC receiving treatment with anti-EGFR mAbs.

**Methods:** We systematically identified articles investigating EGFR GCN by fluorescent or chromogenic *in situ* hybridization or other detection techniques in patients with metastatic CRC treated with panitumumab or cetuximab, (last search: 10 August 2012). Eligible studies had to report on overall survival (OS), progression-free survival (PFS) or time-to-progression (TTP), stratified by EGFR GCN. Summary hazard ratios (HRs) were calculated using random-effects models.

**Results:** Among 13 identified studies, 10 (776 patients, 302 with increased GCN), 8 (893 patients, 282 with increased GCN) and 3 (149 patients, 66 with increased GCN) were eligible for the OS, PFS and TTP meta-analyses, respectively. Increased EGFR GCN was associated with increased OS (HR=0.62; 95% CI 0.50–0.77;  $P<0.001$ ), PFS (HR=0.65; 95% CI 0.47–0.89;  $P=0.008$ ) but not TTP (HR=0.71; 95% CI 0.44–1.14;  $P=0.157$ ). It was also shown that EGFR GCN is independent of other factors such as KRAS status. Among those populations received second-line or higher treatment, increased EGFR GCN was strongly associated with improved survival (for OS, HR=0.60; 95% CI 0.47–0.75;  $P<0.001$ ; for PFS, HR=0.59; 95% CI 0.47–0.75;  $P<0.001$ ), whereas it did not influence survival in patients that received first-line therapy.

**Conclusion:** Among the anti-EGFR-treated patients, increased EGFR GCN appears to be associated with improved survival outcomes. The effect on survival appears to be related to patients receiving the line of treatment.

**Citation:** Jiang Z, Li C, Li F, Wang X (2013) EGFR Gene Copy Number as a Prognostic Marker in Colorectal Cancer Patients Treated with Cetuximab or Panitumumab: A Systematic Review and Meta Analysis. PLoS ONE 8(2): e56205. doi:10.1371/journal.pone.0056205

**Editor:** Jian-Xin Gao, Shanghai Jiao Tong University School of Medicine, China

**Received:** September 18, 2012; **Accepted:** January 7, 2013; **Published:** February 18, 2013

**Copyright:** © 2013 Jiang et al. This is an open-access article distributed under the terms of the Creative Commons Attribution License, which permits unrestricted use, distribution, and reproduction in any medium, provided the original author and source are credited.

**Funding:** This work was supported by China Postdoctoral Science Foundation (2011M500060) and Heilongjiang Postdoctoral Grant (LRB2010-87864). The funders had no role in study design, data collection and analysis, decision to publish, or preparation of the manuscript.

**Competing Interests:** The authors have declared that no competing interests exist.

\* E-mail: wxshan1208@yahoo.com.cn

These authors contributed equally to this work.

## Introduction

The major prognostic determinant for patients with non-resectable metastatic colorectal cancer (CRC) is the response to systemic therapy [1]. During these last years, novel strategies that target the epidermal growth factor receptor (EGFR) have been evaluated in CRC, including monoclonal antibodies (mAbs). These mAbs interfering with the extracellular domain of EGFR, were designed to be used when other treatments failed [2]. Two such mAbs, panitumumab and cetuximab, are active in metastatic colorectal cancer, but the clinical evidence shows that approximately 10% of patients achieve an objective tumor response to anti-EGFR mAbs [2–4]. The identification of patients who are likely to be benefited from EGFR-targeted mAbs is increasingly crucial for improving therapeutic strategies, as well as for reducing the financial burden of health care

systems [5]. Therefore, the reliable prognostic markers of treatment for selected patients need to be identified.

Several clinical studies have shown that the presence of a KRAS mutation is a significant predictor of resistance to anti-EGFR mAbs [6–8]. However, the occurrence of KRAS mutations only accounts for approximately 30% to 40% of nonresponsive patients, suggesting that it may not be the only predictor of cetuximab response and the identification of additional genetic determinants of treatment benefits, still need to be defined. Recently, studies have demonstrated that an increased EGFR gene copy number (GCN), analyzed by the fluorescence *in situ* hybridization (FISH) technique, could be a promising predictor of anti-EGFR mAbs therapy in metastatic colorectal cancer, patients with low GCN are indeed unlikely to respond to anti-

EGFR treatment and have less progression-free time than patients with increased GCN [9–12].

Moroni et al. [9] first reported an increased EGFR GCN association with a favorable response to anti-EGFR therapy among KRAS wild-type CRC patients. However, subsequent studies revealed the conclusion remained inconsistent [10,12]. Studies on the EGFR GCN had shown different trends of the prognosis in CRC, this might be due to a relatively small size and different patient population. Therefore, it is highly necessary to perform a quantitative and systemic study with rigorous methods. Meta-analysis is a powerful means of resolving disparate results. To address the association between variations of EGFR GCN and the survival outcomes of metastatic CRC patients receiving anti-EGFR therapy, a meta-analysis was performed from all eligible studies in this study.

## Materials and Methods

### Identification and Eligibility of Relevant Studies

We performed a systematic computerized search of the MEDLINE (PubMed) database, EMBASE and the Cochrane library (last search: August 10, 2012) to identify all published articles related to the identification of mutations in EGFR pertaining to CRC, using the algorithm: (epidermal growth factor receptor OR EGFR) AND (mutation OR polymorphism OR gene copy number OR GCN OR amplification OR gene status) AND (colorectal cancer OR CRC). Additional studies were identified by a hand search of references of original studies or review articles on this topic. Eligible studies included in the meta-analysis had to meet the following criteria: (a) a cohort colorectal cancer study; (b) hazard ratios (HRs) with corresponding 95% confidence intervals (CIs) comparing overall survival (OS), progression-free survival (PFS) or time-to-progression (TTP) stratified by EGFR gene copy number for patients receiving mono- or combination therapy with either cetuximab or panitumumab were reported or allowed the calculation; and (c) written in English.

### Data Extraction

Two investigators independently extracted data and reached a consensus on all of the items. The following information was extracted from each study: first author, years of publication, number of patients screened, ethnicity of study population, gender, proportion of increased GCN, the specific methods of gene copy number determination were recorded, as were the values for GCN cutoff, KRAS status, anti-EGFR mAbs, study design and also for data linking specific mutation to treatment outcome. Also, we categorized studies by line of treatment. When studies were conducted in mixed treatment settings, we operationally defined studies where at least 80% of patients had received previous chemotherapy as ‘second-line’ studies. Finally, we extracted HRs and their variance for the relevant survival outcomes comparing patients with increased and normal EGFR gene copy number receiving treatment with either cetuximab or panitumumab. The HR is the most appropriate metric for time-to-event outcomes [13,14]. When the HR and/or its variance were not provided by the eligible studies, we used the methods developed by Parmar et al. [14] to calculate them. When *P* values were unavailable, the HR was approximated by the ratio of median survivals [15]. Data was extracted by the Engauge Digitizer version 4.1 (free software downloaded from <http://sourceforge.net>) from survival curves if it was not shown in articles directly, then we estimated the log HR and its variance using the previously reported methods [14,16]. Two authors performed data extraction independently and discrepancies were resolved by consensus including a third author.

### Statistical Analysis

We used the HR and corresponding CI extracted from each study to assess between-study heterogeneity using the *Q* statistics [17] and inconsistency using the *I*<sup>2</sup> index [18] (*I*<sup>2</sup> < 25% no heterogeneity; *I*<sup>2</sup> = 25–50% moderate heterogeneity; *I*<sup>2</sup> > 50% large or extreme heterogeneity). The heterogeneity was considered statistically significant with *P* < 0.10. Summary HRs with their 95% CI were calculated using an inverse variance method. We fitted a random-effects model since between-study heterogeneity was anticipated [19]. Publication bias was investigated by funnel plot, and an asymmetric plot suggested possible publication bias. The funnel plot asymmetry was assessed by Egger’s linear regression test [20]. The *t* test was performed to determine the significance of the asymmetry, and a *P* value of < 0.05 was considered a significant publication bias.

Subgroup analyses were performed to evaluate the effect of ethnicity (East Asian versus white), method of EGFR GCN determination (FISH versus chromogenic *in situ* hybridization (CISH)), KRAS status (wild versus mixed), the specific EGFR mAbs used (cetuximab versus panitumumab) and line of treatment (≥ 80% versus < 80% second-line) on the prognostic value of EGFR GCN.

Statistical analyses were conducted with Stata (version SE/10; StataCorp, College Station, TX). *P* values for all comparisons were two-tailed and the statistical significance was defined as *P* < 0.05 for all tests except those for heterogeneity.

## Results

### Eligibility

Our initial search yielded 76 studies concerning EGFR-targeted treatment in CRC, which were assessed in full text. As indicated in the search ow diagram (Figure 1), 13 studies reported at least one of the outcomes of interest and were finally included in the meta-analysis [10–12,21–30]. The search ow diagram is summarized in Figure 1 and the characteristics of eligible studies are summarized in Table 1.

Eight of the studies employed FISH, one employed CISH and two employed both methods, two employed silver *in situ* hybridization (SISH) and quantitative polymerase chain reaction (qPCR), respectively (Table 1). Gene copy number was scored/assessed according to a different cutoff value, which usually was derived from the receiver operating characteristics (ROC) curve analysis. Twelve studies were retrospective and one was prospective. All eligible studies were small, with sample sizes ranging from 20 to 277 patients (median size = 86 patients, mean size = 92 patients, standard deviation = 67). Overall, the eligible studies reported on 1174 patients, of whom 407 (35%) were characterized as having increased EGFR gene copy number. The frequency increased EGFR gene copy number ranged from 15% to 77%. Eleven of the studies were conducted in European (1058 patients, 338 with increased gene copy number; 32%) whereas two were conducted in East Asian populations (116 patients, 69 with increased gene copy number; 59%). Among all the studies, only three were conducted in wild-type colorectal cancer patients, but two provided data for the outcome in wild-type populations.

### Meta-analysis Database

Regarding OS, 10 studies involving 776 patients (302 with increased gene copy number, 39%) contributed data for the meta-analysis. There was no between-study heterogeneity (*P* = 0.886; *I*<sup>2</sup> = 0.0%) and increased GCN was significantly associated with improved OS among patients treated with anti-EGFR mAbs (HR = 0.62; 95% CI 0.50–0.77; *P* < 0.001) (Figure 2). For PFS, 8

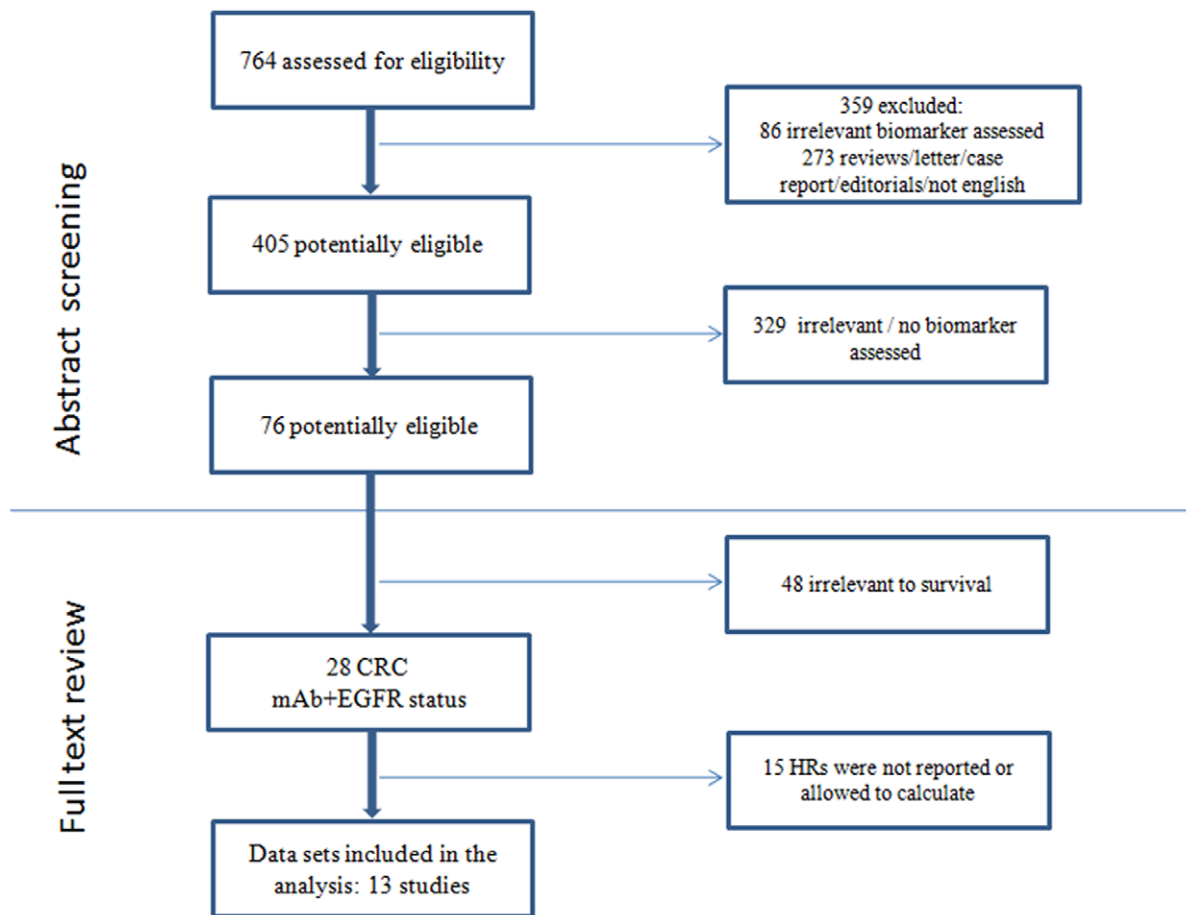

**Figure 1. Search strategy and study eligibility flow chat.**  
doi:10.1371/journal.pone.0056205.g001

studies involving 893 patients (282 with increased gene copy number; 32%) contributed data for the meta-analysis. Large between-study heterogeneity was observed ( $P=0.004$ ;  $I^2=66.0\%$ ) and increased EGFR GCN was significantly associated with improved PFS (HR = 0.65; 95% CI 0.47–0.89;  $P=0.008$ ). Finally, for TTP, only three studies (149 patients, 66 with increased gene copy number, 44%) provided information to be included in the meta-analysis. There was no between-study heterogeneity ( $P=0.331$ ;  $I^2=9.6\%$ ) and we did not find a significant TTP benefit for patients with increased EGFR GCN (HR = 0.71; 95% CI 0.44–1.14;  $P=0.157$ ).

### Subgroup Analysis

The results of subgroup analysis are presented in Table 2. Increased EGFR GCN was statistically significantly associated with increased OS and PFS in studies of  $\geq 80\%$  populations received second-line or higher but not  $<80\%$ , and the positive association was also shown in those populations with KRAS mixed status or wild-type, which suggested EGFR GCN might be an independent prognostic factor. Moreover, positive correlations of increased GCN with OS and PFS were shown in the various ethnicities, anti-EGFR mAbs and detection methods, and no significant difference existed between these subgroups.

### Test of Heterogeneity

There was extreme heterogeneity among the 8 studies including PFS ( $I^2=66$ ,  $P=0.004$ ). Therefore, we performed a meta-re-

gression analysis to evaluate the source of heterogeneity by ethnicity, KRAS status, anti-EGFR mAbs, detection method and line of treatment. However, when we categorized the heterogeneity by these factors, none of these significantly contributed to the observed heterogeneity.

### Sensitivity Analysis

Sensitivity analysis was performed both by sequential remove of individual studies and cumulative statistics for all comparisons of all subjects and subgroups. It was shown that with the passage of time and increasing the sample size, the results of OS and PFS become more stable. The pooled HRs were not influenced by any individual study.

### Publication Bias

Funnel plots and Egger's test were performed to assess publication bias. The data suggested that there was no evidence of publication bias for the study's primary outcome, OS (Begg's test  $P=0.53$ ; Egger's test  $P=0.46$ ), PFS (Begg's test  $P=0.32$ ; Egger's test  $P=0.13$ ), TTP (Begg's test  $P=0.60$ ; Egger's test  $P=0.85$ ).

### Discussion

In the present study, we collected all available studies and carried out a meta analysis to examine the association of variations of EGFR GCN with prognosis of advanced CRC patients. Ten

**Table 1.** Characteristics of studies included in the meta-analysis.

| Author (year) reference     | Patients (N) | Ethnicity  | Gender (M/F) | Increased EGFR gene copy number, n (%) | DetectionGCN method | cutoff   | KRAS status        | anti-EGFR mAbs | Line of treatment (proportion of second-line or higher) | Study design  | Outcome reported |
|-----------------------------|--------------|------------|--------------|----------------------------------------|---------------------|----------|--------------------|----------------|---------------------------------------------------------|---------------|------------------|
| Sartore-Bianchi (2007) [10] | 58           | White      | 33/25        | 19(33)                                 | FISH                | 2.5      | NR                 | panitumumab    | ≥80%                                                    | retrospective | OS,PFS           |
| Cappuzzo (2008) [12]        | 85           | White      | 54/31        | 43(51)                                 | FISH                | 2.92     | NR                 | cetuximab      | ≥80%                                                    | retrospective | OS,TTP           |
| Gonçalves (2008) [21]       | 20           | White      | 10/10        | 8(40)                                  | FISH                | 2        | mixed              | cetuximab      | ≥80%                                                    | retrospective | TTP              |
| Personeni (2008) [11]       | 87           | White      | 49/38        | 33(38)                                 | FISH                | 2.83     | mixed              | cetuximab      | ≥80%                                                    | prospective   | OS,PFS           |
| Scartozzi (2009)[22]        | 44           | White      | 23/21        | 15(40)                                 | FISH/CISH           | 2.6/2.12 | wild-type          | cetuximab      | ≥80%                                                    | retrospective | OS,TTP           |
| Laurent-Puig (2009) [23]    | 96           | White      | NR           | 17(22)                                 | FISH/CISH           | 2/NR     | wild-type          | cetuximab      | ≥80%                                                    | retrospective | OS,PFS           |
| Li (2010) [24]              | 74*          | East Asian | 43/31        | 53(77)                                 | FISH                | 2        | mixed <sup>§</sup> | cetuximab      | ≥80%                                                    | retrospective | OS,PFS           |
| Tol (2010) [25]             | 277          | White      | NR           | 41(15)                                 | FISH                | #        | mixed              | cetuximab      | <80%                                                    | retrospective | PFS              |
| Campanella (2010) [26]      | 101          | White      | 62/39        | 56(56)                                 | FISH                | 2        | mixed              | cetuximab      | <80%                                                    | retrospective | PFS              |
| Bengala (2010) [27]         | 146          | White      | 96/60        | 29(20)                                 | FISH                | 2.9      | mixed              | NR             | <80%                                                    | retrospective | OS,PFS           |
| Scartozzi (2011)[28]        | 90           | White      | 59/31        | 43(48)                                 | CISH                | 2.12     | wild-type          | cetuximab      | ≥80%                                                    | retrospective | OS               |
| Lin (2011) [29]             | 42           | East Asian | 19/23        | 16(38)                                 | qPCR                | 1.5      | mixed              | cetuximab      | ≥80%                                                    | retrospective | OS               |
| Algars (2011) [30]          | 54           | White      | 30/24        | 34(63)                                 | SISH                | 4        | mixed <sup>§</sup> | mixed          | ≥80%                                                    | retrospective | OS,PFS           |

\*of 74 patients, EGFR FISH analysis was successfully detected in 69 of the tumor samples.

<sup>§</sup>also provided information for the outcome in wild-type populations.

<sup>#</sup>an increased GCN was defined as an average of three or more locus copies per nucleus, or a locus to centromere ratio of two or more.

M, male; F, female; FISH, fluorescent *in situ* hybridization; CISH, chromogenic *in situ* hybridization; qPCR, quantitative polymerase chain reaction; SISH, silver *in situ* hybridization; NR, not reported; OS, overall survival; PFS, progression-free survival; TTP, time-to-progression.

doi:10.1371/journal.pone.0056205.t001

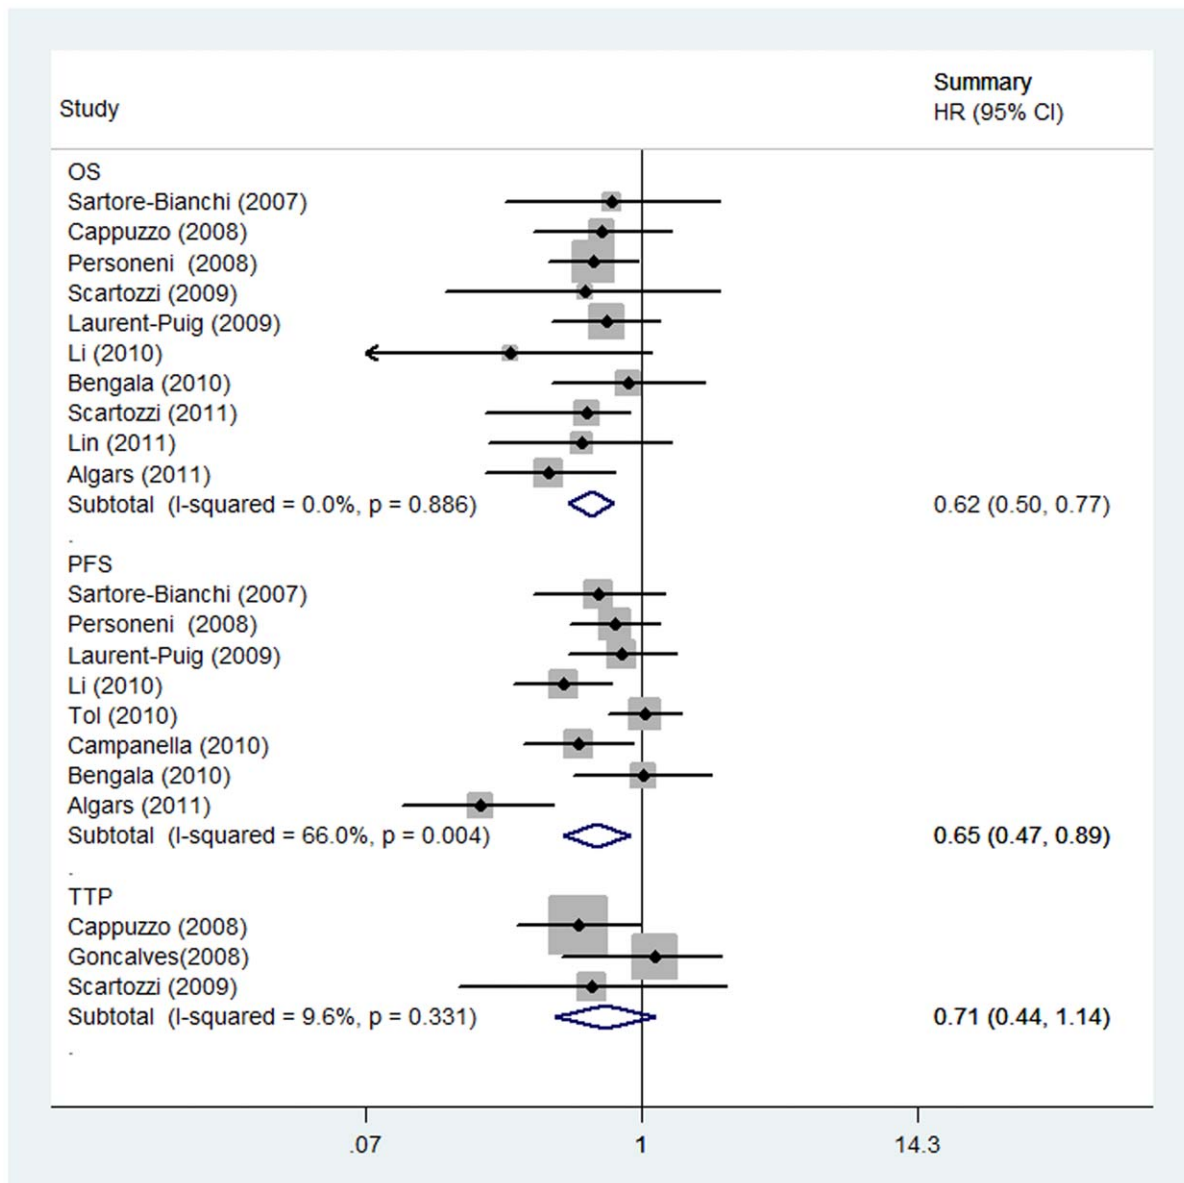

**Figure 2. Forest plot for survival stratified by overall survival (OS), progression-free survival (PFS) and time-to-progression (TTP).** Hazard ratios (HR) comparing patients with increased versus not increased EGFR gene copy number are presented. Each study is shown by the point estimate of the HR (square proportional to the weight of each study) and 95% confidence interval for the HR (extending lines); summary HR and their 95% confidence intervals by random-effects calculations are shown by diamonds. Value lower than one indicates that patients with increased EGFR gene copy number have improved survival compared to patients without increase in EGFR gene copy number.  
doi:10.1371/journal.pone.0056205.g002

studies involving 776 patients on OS, eight studies involving 893 patients on PFS and three studies on TTP were critically reviewed. We subgrouped the articles into five groups (ethnicity, KRAS status, anti-EGFR mAbs, detection method and line of treatment). Meta-analysis showed increased EGFR GCN was significantly associated with improved OS and PFS but not TTP. The median OS of patients harboring increased GCN showed 1.61-fold increase, the median PFS showed 1.54-fold increase. A meta-analysis of these studies confirms that increased EGFR GCN is indeed associated with a moderate OS and PFS benefit, from anti-EGFR treatment for metastatic CRC patients. Similarly, EGFR gene copy number has also been evaluated as a potential predictor of response of tyrosine kinase inhibitors (TKIs) in non-small-cell lung cancer patients, and a meta analysis has demonstrated an

association between increased EGFR copy number, and improved survival outcomes [31]. Recently, Yang *et al.* performed a meta analysis to differentiate the objective response rate (ORR) between patients with increased EGFR GCN and those with no increased EGFR GCN [32]. They suggested a general trend towards higher ORR in patients with increased EGFR GCN. However, for important prognostic factors as PFS and OS, as the data was relatively incomplete, they only descriptively reviewed published papers and did not perform quantitative synthesis of the studies. In this study, several excellent HR extraction methods were used to calculate the pooled HR quantitatively. The result showed increased EGFR GCN association with improved survival outcomes among anti-EGFR-treated patients. These results imply the

**Table 2.** Subgroup analyses for overall and progression-free survival for treatment with anti-EGFR drugs, comparing patients with increased versus not increased EGFR copynumber.

| Comparison                 | Overall survival                                   |                            | Progression-free survival                          |                            |
|----------------------------|----------------------------------------------------|----------------------------|----------------------------------------------------|----------------------------|
|                            | Number of studies, heterogeneity ( $P_Q$ , $I^2$ ) | HR (95% CI); $P$ value     | Number of studies, heterogeneity ( $P_Q$ , $I^2$ ) | HR (95% CI); $P$ value     |
| All studies                | 10(0.886; 0)                                       | 0.616(0.495–0.766); <0.001 | 8(0.004; 66)                                       | 0.651(0.474–0.894); 0.008  |
| Ethnicity                  |                                                    |                            |                                                    |                            |
| White                      | 8(0.885; 0)                                        | 0.634(0.504–0.796); <0.001 | 7(0.008; 65.6)                                     | 0.784(0.616–0.907); 0.003  |
| East Asian                 | 2(0.405; 0)                                        | 0.458(0.219–0.961); 0.039  | 1(NA)                                              | 0.470(0.292–0.756); 0.002  |
| KRAS status                |                                                    |                            |                                                    |                            |
| wild-type                  | 5(0.504; 0)                                        | 0.545(0.388–0.766); <0.001 | 3(0.002; 83.9)                                     | 0.345(0.130–0.919); 0.033  |
| mixed                      | 5(0.461; 0)                                        | 0.575(0.428–0.771); <0.001 | 6(0.001; 75.2)                                     | 0.688(0.564–0.840); <0.001 |
| anti-EGFR mAbs             |                                                    |                            |                                                    |                            |
| cetuximab                  | 7(0.945; 0)                                        | 0.624(0.485–0.803); <0.001 | 5(0.074; 53.2)                                     | 0.746(0.610–0.916); 0.004  |
| others                     | 3(0.269; 23.8)                                     | 0.593(0.384–0.915); 0.018  | 3(0.006; 80.5)                                     | 0.551(0.373–0.814); 0.003  |
| Detection method           |                                                    |                            |                                                    |                            |
| FISH                       | 5(0.703; 0)                                        | 0.660(0.488–0.894); 0.007  | 6(0.096; 46.5)                                     | 0.747(0.614–0.910); 0.004  |
| others                     | 5(0.780; 0)                                        | 0.572(0.418–0.782); <0.001 | 2(0.003; 88.7)                                     | 0.517(0.339–0.791); 0.002  |
| Line of treatment          |                                                    |                            |                                                    |                            |
| <80% second-line or higher | 1(NA)                                              | 0.880(0.419–1.847); 0.735  | 3(0.121; 52.7)                                     | 0.874(0.667–1.146); 0.330  |
| ≥80% second-line or higher | 9(0.908; 0)                                        | 0.596(0.474–0.748); <0.001 | 5(0.019; 66.1)                                     | 0.590(0.465–0.748); <0.001 |

Subgroup analyses was performed when at least two studies were in each subgroup.

Subgroup analysis was not performed for TTP as only three studies provided information for this outcome.

FISH, fluorescent *in situ* hybridization; NA, not applicable; CI, confidence interval; HR, hazard ratio.

doi:10.1371/journal.pone.0056205.t002

EGFR GCN might be not only an effective predictive but also a valuable prognostic marker.

The anti-EGFR monoclonal antibody is effective in prolonging survival in patients with metastatic colorectal cancer after failure of conventional chemotherapy [33,34]. In our stratified analysis, the increased EGFR GCN was significantly associated with improved OS and PFS in those populations that received second-line or higher but not first-line, which coincided with the strategies in clinical practice of chemotherapy. From a clinical point of view, not only in the US and Europe but also in China, anti-EGFR mAbs were usually used in wild-type KRAS mCRC patients. So, assessing the role of EGFR GCN in patients with wild-type KRAS may be more meaningful. In this study, we found that the prognostic value of EGFR GCN on survival appears to not be related to KRAS status, which suggested EGFR GCN might be an independent prognostic biomarker. The significant association between survival with EGFR GCN, revealed tumor growth is probably mainly driven by the EGFR pathway and this biological characteristic is evoked by an increase in EGFR copy number.

EGFR is a transmembrane tyrosine kinase receptor that, on ligand binding, triggers two main signaling pathways, the RAS-RAF-MAPK axis, which is mainly involved in cell proliferation, and the PI3K-PTEN-AKT pathway, which is mainly involved in cell survival and motility [35]. The anti-EGFR mAbs have been proven to be effective in metastatic colorectal cancer. The molecular mechanisms underlying the clinical response to this drug remain unknown. Genetic alterations in EGFR-related signaling pathways may have an effect on response to this targeted therapy, which may be due to the constitutive activation of the downstream genes of the EGFR signaling pathway such as KRAS, BRAF, or PIK3C2A, or to the loss of a tumor suppressor gene such as PTEN. Until now, the most

acceptable marker, as a predictive and prognostic factor, was the status of KRAS. However, KRAS was not the only predictor of the cetuximab response. The present study was aimed at assessing the prognostic role of EGFR GCN, in terms of clinical outcome, in patients treated with anti-EGFR mAbs. EGFR GCN detection also appears to be relevant to positively identify responders. Variations of GCN, reflect the many different routes taken by individual tumors to disrupt/escape mechanisms governing normal cellular behavior. In most solid tumors, including CRC, the best characterized mechanisms underlying increased EGFR GCN are gene amplification and chromosome 7 polysomy [9,10,12,36].

Current obstacles for a future clinical application of EGFR GCN are mainly concentrated on the following two aspects: detection methods and difficult technical reproducibility. FISH technique has been used in most previous studies, but the FISH results are challenging to interpret and the lack of standardization of analytical methods and scoring systems may partly explain why the EGFR GCN evaluation has not been incorporated into clinical practice yet [37]. When looking at the different cutoff values in the literature, we found reproducibility remains a large obstacle for its practical usefulness and an international consensus on the definition of cutoff points is needed. Sartore-Bianchi *et al.* also found that molecule diagnosis of EGFR GCN by FISH among five highly experienced pathology centers varied largely, a detailed scoring system and comprehensive training programmes are necessary [38]. Although different cutoff points have been applied, 95% CIs around sensitivity and specificity yielded by each cutoff point were similar, thus indicating that results from these studies are consistent. In the present study, we analyzed the influence of GCN detection method on survival and did not found any discrepancies.

There are several limitations kept in consideration in this meta-analysis. First, most of the studies were not conclusive because they evaluated limited patient series that were nonhomogeneously treated. Second, relatively small sample sizes included in East Asians may also influence the results, and further studies are necessary to detect the potential role of GCN. Third, primarily the unavailability of individual patient data that would allow correction for potential confounding factors such as age, gender, or additional genetic aberrations. Finally, different detection methods used in the studies included in the analysis may have different quality control issues.

In conclusion, our meta-analysis provides evidence that EGFR gene copy number is a prognostic marker for survival among

patients receiving anti-EGFR mAbs for advanced colorectal cancer. Furthermore, according to our results, the prognostic ability of EGFR gene copy number appears to be significantly stronger among those populations that received second-line or higher treatment.

## Author Contributions

Contributed some part of additional potentially eligible literature: FL. Conceived and designed the experiments: XW. Performed the experiments: ZJ CL FL. Analyzed the data: ZJ CL. Contributed reagents/materials/analysis tools: ZJ CL FL. Wrote the paper: ZJ CL.

## References

- Cunningham D, Atkin W, Lenz HJ, Lynch HT, Minsky B, et al. (2010) Colorectal cancer. *Lancet* 375: 1030–1047.
- Jonker DJ, O'Callaghan CJ, Karapetis CS, Zalcberg JR, Tu D, et al. (2007) Cetuximab for the treatment of colorectal cancer. *N Engl J Med* 357: 2040–8.
- Cunningham D, Humblet Y, Siena S, Khayat D, Bleiberg H, et al. (2004) Cetuximab monotherapy and cetuximab plus irinotecan in irinotecan-refractory metastatic colorectal cancer. *N Engl J Med* 351: 337–45.
- Van Cutsem E, Peeters M, Siena S, Humblet Y, Hendlisz A, et al. (2007) Open-label phase III trial of panitumumab plus best supportive care compared with best supportive care alone in patients with chemotherapy-refractory metastatic colorectal cancer. *J Clin Oncol* 25: 1658–64.
- Schrag D. (2004) The price tag on progress: Chemotherapy for colorectal cancer. *N Engl J Med* 351: 317–319.
- Lièvre A, Bachet JB, Le Corre D, Boige V, Landi B, et al. (2006) KRAS mutation status is predictive of response to cetuximab therapy in colorectal cancer. *Cancer Res* 66: 3992–5.
- Khambata-Ford S, Garrett CR, Meropol NJ, Basik M, Harbison CT, et al. (2007) Expression of epiregulin and amphiregulin and K-ras mutation status predict disease control in metastatic colorectal cancer patients treated with cetuximab. *J Clin Oncol* 25: 3230–7.
- Lièvre A, Bachet JB, Boige V, Cayre A, Le Corre D, et al. (2008) KRAS mutations as an independent prognostic factor in patients with advanced colorectal cancer treated with cetuximab. *J Clin Oncol* 26: 374–9.
- Moroni M, Veronese S, Benvenuti S, Marrapese G, Sartore-Bianchi A, et al. (2005) Gene copy number for epidermal growth factor receptor (EGFR) and clinical response to antiEGFR treatment in colorectal cancer: a cohort study. *Lancet Oncol* 6: 279–86.
- Sartore-Bianchi A, Moroni M, Veronese S, Carnaghi C, Bajetta E, et al. (2007) Epidermal growth factor receptor gene copy number and clinical outcome of metastatic colorectal cancer treated with panitumumab. *J Clin Oncol* 25: 3238–45.
- Personeni N, Fieuws S, Piessevaux H, De Hertogh G, De Schutter J, et al. (2008) Clinical usefulness of EGFR gene copy number as a predictive marker in colorectal cancer patients treated with cetuximab: a fluorescence in situ hybridization study. *Clin Cancer Res* 14: 5869–76.
- Cappuzzo F, Finocchiaro G, Rossi E, Jänne PA, Carnaghi C, et al. (2008) EGFR FISH assay predicts for response to cetuximab in chemotherapy refractory colorectal cancer patients. *Ann Oncol* 19: 717–23.
- Tierney JF, Stewart LA, Ghersi D, Burdett S, Sydes MR (2007) Practical methods for incorporating summary time-to-event data into meta-analysis. *Trials* 8: 16.
- Parmar MK, Torri V, Stewart L (1998) Extracting summary statistics to perform meta-analyses of the published literature for survival endpoints. *Stat Med* 17: 2815–2834.
- Kyriogiou M, Salanti G, Pavlidis N, Paraskevaidis E, Ioannidis JP (2006) Survival benefits with diverse chemotherapy regimens for ovarian cancer: meta-analysis of multiple treatments. *J Natl Cancer Inst* 98: 1655–1663.
- Williamson PR, Smith CT, Hutton JL, Marson AG (2002) Aggregate data meta-analysis with time-to-event outcome. *Stat Med* 21: 3337–51.
- Lau J, Ioannidis JP, Schmid CH (1997) Quantitative synthesis in systematic reviews. *Ann Intern Med* 127: 820–826.
- Higgins JP, Thompson SG, Deeks JJ, Altman DG (2003) Measuring inconsistency in meta-analyses. *BMJ* 327: 557–560.
- DerSimonian R, Laird N. (1986) Meta-analysis in clinical trials. *Control Clin Trials* 7: 177–188.
- Egger M, Davey Smith G, Schneider M, Minder C. (1997) Bias in meta-analysis detected by a simple, graphical test. *BMJ* 315: 629–634.
- Gonçalves A, Esteyries S, Taylor-Smedra B, Lagarde A, Ayadi M, et al. (2008) A polymorphism of EGFR extracellular domain is associated with progression free-survival in metastatic colorectal cancer patients receiving cetuximab-based treatment. *BMC Cancer* 8: 169.
- Scartozzi M, Bearzi I, Mandolesi A, Pierantoni C, Loupakis F, et al. (2009) Epidermal Growth Factor Receptor (EGFR) gene copy number (GCN) correlates with clinical activity of irinotecan-cetuximab in K-RAS wild-type colorectal cancer: a fluorescence in situ (FISH) and chromogenic in situ hybridization (CISH) analysis. *BMC Cancer* 9: 303.
- Laurent-Puig P, Cayre A, Manceau G, Buc E, Bachet JB, et al. (2009) Analysis of PTEN, BRAF, and EGFR status in determining benefit from cetuximab therapy in wild-type KRAS metastatic colon cancer. *J Clin Oncol* 27: 5924–5930.
- Li YH, Wang F, Shen L, Deng YM, Shao Q, et al. (2011) EGFR fluorescence in situ hybridization pattern of chromosome 7 disomy predicts resistance to cetuximab in KRAS wild-type metastatic colorectal cancer patients. *Clin Cancer Res* 17: 382–90.
- Tol J, Dijkstra JR, Klomp M, Teerenstra S, Dommerholt M, et al. (2010) Markers for EGFR pathway activation as predictor of outcome in metastatic colorectal cancer patients treated with or without cetuximab. *Eur J Cancer* 46: 1997–2009.
- Campanella C, Mottolise M, Cianciulli A, Torsello A, Merola R, et al. (2010) Epidermal growth factor receptor gene copy number in 101 advanced colorectal cancer patients treated with chemotherapy plus cetuximab. *J Transl Med* 8: 36.
- Bengala C, Bettelli S, Bertolini F, Sartori G, Fontana A, et al. (2010) Prognostic role of EGFR gene copy number and KRAS mutation in patients with locally advanced rectal cancer treated with preoperative chemoradiotherapy. *Br J Cancer* 103: 1019–24.
- Scartozzi M, Giampieri R, Maccaroni E, Mandolesi A, Giustini L, et al. (2012) Analysis of HER-3, insulin growth factor-1, nuclear factor-kB and epidermal growth factor receptor gene copy number in the prediction of clinical outcome for K-RAS wild-type colorectal cancer patients receiving irinotecan-cetuximab. *Ann Oncol* 23: 1706–12.
- Lin JK, Lin AJ, Lin CC, Lan YT, Yang SH, et al. (2011) The status of EGFR-associated genes could predict the outcome and tumor response of chemotherapy-refractory metastatic colorectal patients using cetuximab and chemotherapy. *J Surg Oncol* 104: 661–666.
- Algars A, Lintunen M, Carpen O, Ristamäki R, Sundström J (2011) EGFR gene copy number assessment from areas with highest EGFR expression predicts response to anti-EGFR therapy in colorectal cancer. *Br J Cancer* 105: 255–262.
- Dahabreh IJ, Linardou H, Kosmidis P, Bafaloukos D, Murray S (2011) EGFR gene copy number as a predictive biomarker for patients receiving tyrosine kinase inhibitor treatment: a systematic review and meta-analysis in non-small-cell lung cancer. *Ann Oncol* 22: 545–552.
- Yang ZY, Shen WX, Hu XF, Zheng DY, Wu XY, et al. (2012) EGFR gene copy number as a predictive biomarker for the treatment of metastatic colorectal cancer with anti-EGFR monoclonal antibodies: a meta-analysis. *J Hematol Oncol* 5: 52.
- Van Cutsem E, Peeters M, Siena S, Humblet Y, Hendlisz A, et al. (2007) Open-label phase III trial of panitumumab plus best supportive care compared with best supportive care in patients with chemotherapy-refractory metastatic colorectal cancer. *J Clin Oncol* 25: 1658–1664.
- Van Cutsem E, Siena S, Humblet Y, Canon JL, Maurel J, et al. (2008) An open-label, single-arm study assessing safety and efficacy of panitumumab in patients with metastatic colorectal cancer refractory to standard chemotherapy. *Ann Oncol* 19: 92–98.
- Chung KY, Shia J, Kemeny NE, Shah M, Schwartz GK, et al. (2005) Cetuximab shows activity in colorectal cancer patients with tumors that do not express the epidermal growth factor receptor by immunohistochemistry. *J Clin Oncol* 23: 1803–1810.
- Hirsch FR, Varella-Garcia M, Bunn PA Jr, Di Maria MV, Veve R, et al. (2003) Epidermal growth factor receptor in non-small-cell lung carcinomas: correlation between gene copy number and protein expression and impact on prognosis. *J Clin Oncol* 21: 3798–807.
- Martin V, Mazzucchelli L, Frattini M (2009) An overview of the epidermal growth factor receptor fluorescence in situ hybridisation challenge in tumour pathology. *J Clin Pathol* 62: 314–324.
- Sartore-Bianchi A, Fieuws S, Veronese S, Moroni M, Personeni N, et al. (2012) Standardisation of EGFR FISH in colorectal cancer: results of an international interlaboratory reproducibility ring study. *J Clin Pathol* 65: 218–23.
